## The extent and impact of variation in ADME genes in sub-Saharan African populations

Jorge da Rocha<sup>1,2,‡</sup>, Houcemeddine Othman<sup>1,‡</sup>, Gerrit Botha<sup>3,‡</sup>, Laura Cottino<sup>1,2,‡</sup>, David Twesigomwe<sup>1,2,‡</sup>, Samah Ahmed<sup>4,‡</sup>, Britt I. Drögemöller<sup>5</sup>, Faisal M. Fadlelmola<sup>4,‡</sup>, Philip Machanick<sup>6,‡</sup>, Mamana Mbiyavanga<sup>3,‡</sup>, Sumir Panji<sup>3,‡</sup>, Galen E.B. Wright<sup>7,8</sup>, Clement Adebamowo<sup>9,10,‡</sup>, Mogomotsi Matshaba<sup>11,12,‡</sup>, Michèle Ramsay<sup>1,2,‡</sup>, Gustave Simo<sup>13,‡</sup>, Martin C. Simuunza<sup>14,‡</sup>, Caroline T. Tiemessen<sup>15</sup>, Sandra Baldwin<sup>16</sup>, Mathias Chiano<sup>17</sup>, Charles Cox<sup>17</sup>, Annette S. Gross<sup>18</sup>, Pamela Thomas<sup>19</sup>, Francisco-Javier Gamo<sup>20</sup> and Scott Hazelhurst<sup>21,1,‡,\*</sup> as members of the H3Africa Consortium<sup>‡</sup>.

**1** Sydney Brenner Institute for Molecular Bioscience, Faculty of Health Sciences, University of the Witwatersrand, Johannesburg, South Africa.

**2** Division of Human Genetics, National Health Laboratory Service, and School of Pathology, Faculty of Health Sciences, University of the Witwatersrand, Johannesburg, South Africa.

**3** Computational Biology Division and H3ABioNet, Department of Integrative Biomedical Sciences, University of Cape Town, South Africa.

**4** Centre for Bioinformatics and Systems Biology, Faculty of Science, University of Khartoum, Sudan.

**5** Department of Biochemistry & Medical Genetics, University of Manitoba.

**6** Department of Computer Science, Rhodes University, Makhanda, South Africa.

**7** Neuroscience Research Program, Kleysen Institute for Advanced Medicine, Winnipeg Health Sciences Centre and Max Rady College of Medicine, University of Manitoba,

**8** Department of Pharmacology and Therapeutics, Rady Faculty of Health Sciences, University of Manitoba, Winnipeg, Manitoba, Canada.

**9** Institute for Human Virology, Abuja, Nigeria.

**10** Institute of Human Virology and Greenebaum Comprehensive Cancer Center, University of Maryland School of Medicine, Baltimore, MD, United States.

- 11 Botswana-Baylor Children's Clinical Center of Excellence, Gaborone, Botswana.
- 12 Baylor College of Medicine, Houston, United States.
- 13 Molecular Parasitology and Entomology Unit, Department of Biochemistry, Faculty of Science, University of Dschang, Dschang, Cameroon.
- 14 Department of Disease Control, School of Veterinary Medicine, University of Zambia, Lusaka, Zambia.
- 15 Centre for HIV and STIs, National Institute for Communicable Diseases, National Health Laboratory Services and Faculty of Health Sciences, University of the Witwatersrand, Johannesburg South Africa.
- 16 Drug Metabolism & Pharmacokinetics, GlaxoSmithKline R&D, Ware, UK.
- 19 Data and Computational Sciences, GlaxoSmithKline R&D, Stevenage, UK.
- 17 Human Genetics, GlaxoSmithKline R&D, Stevenage, UK.
- 18 Clinical Pharmacology Modelling & Simulation, GlaxoSmithKline R&D, Sydney, Australia.
- 20 Global Health, GlaxoSmithKline R&D, Madrid, Spain.
- 21 School of Electrical & Information Engineering, University of the Witwatersrand, Johannesburg, South Africa.
- ‡Members of the Human Heredity and Health in Africa Consortium. Authors not marked with ‡ are members of the H3A/GSK ADME Collaboration but not of the H3Africa consortium.
- \* [scott.hazelhurst@wits.ac.za](mailto:scott.hazelhurst@wits.ac.za)

## Abstract

Investigating variation in genes involved in the *absorption, distribution, metabolism, and excretion* (ADME) of drugs are key to characterising pharmacogenomic (PGx) relationships. ADME gene variation is relatively well characterised in European and Asian populations, but African populations are under-studied – which has implications for safe and effective drug use in Africa.

The genetic diversity of ADME genes across sub-Saharan African populations is large. The Southern African population cluster is most distinct from that of far West Africa. PGx strategies based on European variants will be of limited use in African populations.

Although established variants are important, PGx must take into account the full range of African variation. This work urges further characterisation of variants in African populations including *in vitro* and *in silico* studies, and to consider the unique African ADME landscape when developing precision medicine guidelines and tools for African populations.

## Author summary

The ADME genes are a group of genes that play a key role in absorption, distribution, metabolism and excretion of drugs. Variations in these genes can have a significant impact on drug safety and efficacy. Africa has a high level of genetic variation and is under-studied in drug development, which makes study of variations in these genes in African populations very important. Using a new data set of 458 high-coverage genomes from across Africa, we characterise the extent and impact of variation in the ADME genes, looking at both single nucleotide and copy number variations. We identified 343,368 variants, including 40,692 novel variants, and 930 coding variants which are predicted to have high impact on function. Our discovery curves indicate that there will be considerable value in sequencing more African genomes. Moreover, relatively few of these novel variants are captured on common genotyping arrays. We show that there is considerable diversity within Africa in some important genes, and this will have significant consequences for the emerging field of precision medicine in Africa.

## 1 Introduction and background

Pharmacogenomics (PGx) aims to improve drug safety and efficacy using genomic knowledge for genes involved in drug action [1] with a focus on genes that have important roles in drug safety, pharmacokinetics and pharmacodynamics. Genes involved in pharmacokinetics are typically defined by the role they play in the absorption, distribution, metabolism and excretion (ADME) of drug molecules.

Variation in ADME genes play an important role in determining the response to drug treatment in an individual patient. We characterise the extent and impact of variation in these genes in a novel, high-coverage whole genome sequence dataset from a diverse

group of Africans. 10

ADME genes have different functions: (1) phase I metabolising enzymes, (2) phase II 11  
metabolising enzymes, (3) drug transporters and (4) modifiers. PharmaADME 12  
(<http://pharmaadme.org>) classifies the ADME genes in two classes. The 32 *core* genes 13  
have known biomarkers linked to ADME outcomes. For the 267 *extended* ADME genes, 14  
there is weaker evidence of functional consequences *in vitro* or *in vivo*, or they are 15  
important for a limited number of drugs only. 16

**Rationale** Currently the majority of patients studied in drug development programmes 17  
are of European or Asian ancestry. The African continent is the cradle of human origin 18  
and African populations are characterised by high genetic diversity and complex 19  
population structure. Despite this genetic variation, drug efficacy and safety have not 20  
been comprehensively studied in the populations of Sub-Saharan Africa (SSA) [2]. This 21  
is of specific relevance to SSA, where high burdens of disease are amplified by 22  
non-optimal treatment outcomes. 23

The particular diversity of ADME genes in SSA has been reported in some studies. 24  
Hovelson *et al.* [3] and Lakiotaki *et al.* [4] found that the greatest levels of coding ADME 25  
variation per personal haplotype were shown in some African populations sampled in 26  
the 1000 Genomes Project (KGP) data. Examples of the impact of this variation can be 27  
seen in *CYP2B6* and *CYP2D6* variation affecting efavirenz and primaquine respectively. 28  
An efavirenz dosage reduction has been recommended for HIV patients in SSA due to 29  
the high frequency of functional variants in the *CYP2B6* gene that result in a higher risk 30  
of adverse drug reactions [5]. Potential polymorphisms in the human cytochrome 31  
*CYP2D6* gene may negatively influence efficacy of primaquine, and significantly affect 32  
malaria elimination strategies [6, 7]. African specific variation in several genes may 33  
impact the PK of rosuvastatin, a drug used to treat hypercholesterolemia [8]. While 34  
these studies represent only a fraction of the continent, they serve to highlight the 35  
importance of future studies which are aimed at providing a more comprehensive 36  
overview of the landscape of ADME variation across Africa. 37

Therefore it is important to gain a better understanding of the variation that exists in 38  
ADME genes, both within and between different SSA populations. This information 39  
could be used to inform recommended drug dosage regimens for patients in SSA based 40

on potential pharmacokinetic effects and consequently efficacy and safety. To date, no studies have systematically investigated ADME variation within a diverse set of African populations. We therefore aim to provide valuable information regarding the variation that exists in ADME genes, both within and between different SSA populations. This information could provide insight into drug efficacy and safety for patients in SSA and play a role in ensuring safe and efficacious treatments for the high burden of diseases in populations in SSA. We have characterised the extent and impact of variation in ADME genes in a novel, high-coverage whole genome sequence dataset from a diverse group of Africans.

## 2 Results

### 2.1 Description of Samples

Four hundred fifty eight high coverage whole genome sequences were used in the study as the primary data set (we call this the high coverage African ADME Dataset – HAAD). The foundation of this set were sequences generated by the Human Health and Heredity in Africa (H3A) consortium [9, 10]. The sources and countries of origins of the samples can be found in Table 1 and Fig 1. The population structure of participants in this study is broadly representative of speakers of Niger-Congo languages from West through South Africa. Representation from Nilo-Saharan and Afro-Asiatic populations is sparse. There also are few individuals of Khoe and San heritage, although significant admixture from Khoe and San speakers is found in Bantu-speakers in Southern Africa [11].

We supplement some analyses with African datasets from the KGP (we use KGA specifically to refer to the African genomes in KGP). As the KGP datasets are low coverage, not all analyses were performed with the KGA dataset in addition to HAAD.

### 2.2 Population structure

A principal component (PC) and structure analysis of our data shows high genome-scale variation and that we have significant breadth and depth of coverage of African genomic diversity across west, central and southern Africa, with lesser coverage in east Africa. The PC analysis of our data shows a strong correlation to geographical location (Fig 2

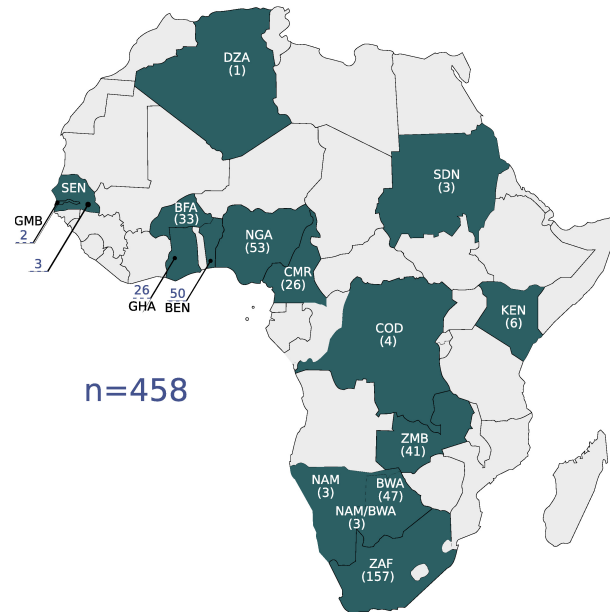

**Fig 1.** The geographic locations of the high coverage WGS data are shown on the map. Countries are referenced by their ISO 3166-1 alpha-3 code: BEN: Benin; BFA: Burkina Faso; BWA: Botswana; CMR: Cameroon; COD: Democratic Republic of the Congo; DZA: Algeria; GHA: Ghana; GMB: Gambia; KEN: Kenya; NAM: Namibia; NGA: Nigeria; SDN: Sudan; SEN: Senegal; ZAF: South Africa; ZMB: Zambia. The number of samples per country is shown in parentheses.

and supplementary section 1).

To explore diversity between different African regions we clustered the studied population together with reference data sets using PC data (see *Methods*, Table 2). The PC analysis shows that the HAAD samples fall broadly into three groups: West (Ghana, Burkina Faso, Nigeria), South/Central (Cameroon, Zambia, Botswana, South Africa), South (Botswana, South Africa) African populations. The variability in the Southern group primarily arises through differential admixture between Bantu, Khoe and San speakers. There is a *Far West* group comprising individuals in HAAD and KGA from Gambia, Senegal and Sierra Leone. There are also a few individuals from other African regions. Note that there is significant diversity within countries; and in some cases overlap between countries – e.g. some participants that we label as “South/Central” live to the south of some participants in the “Southern” group.

**Table 1.** Sources of high-coverage data sets used to form HAAD: 272 genomes were generated by a supplementary grant from the NIH to the H3A Consortium [9] for the primary purpose of designing a custom genotyping array; 140 were shared by African collaborators; and the rest are publicly available, 15 genomes came from the South African Human Genome Programme, and 31 genomes were from the Simons Genome Diversity Project.

| H3A Consortium Data: High Coverage   |                                      |     |
|--------------------------------------|--------------------------------------|-----|
| Benin                                | University of Montréal               | 50  |
| Burkina Faso                         | AWI-Gen                              | 33  |
| Botswana                             | BHP                                  | 47  |
| Cameroon                             | University of Dschang                | 26  |
| Ghana                                | AWI-Gen                              | 26  |
| Nigeria                              | Institute of Human Virology          | 49  |
| South Africa                         | AWI-Gen                              | 100 |
| Zambia                               | University of Zambia                 | 41  |
| African collaborators: High coverage |                                      |     |
| South Africa                         | SA Human Genome Programme            | 15  |
| South Africa                         | Cell Biology Research Lab, NICD/Wits | 40  |
| Public data sets                     |                                      |     |
| Various                              | Simons Foundation                    | 31  |

**Table 2.** Clusters within Africa, including the number of individuals in each cluster. Clusters include both HAAD and 1000 Genomes African population data.

| Identifier | Number | Region               |
|------------|--------|----------------------|
| SA         | 166    | Southern Africa      |
| SC         | 172    | South/Central Africa |
| KS         | 5      | Khoe and San         |
| FW         | 185    | Far West Africa      |
| WE         | 309    | West Africa          |
| O          | 5      | Outliers             |

### 2.3 Overall Characterisation of ADME variation

Gene-based genetic variation for the core and extended ADME gene categories was assessed for composition and type, including introns, upstream and downstream flanking regions (Fig 3). Comparisons were made between the HAAD dataset and the KGA dataset, which represent samples in the joint called HAAD and African 1000 Genomes Project populations respectively (Methods 5.3.1). In ADME core genes, we counted a total of 40,714 and 36,088 variants for HAAD and KGA data respectively while for the extended ADME genes there were 274,798 and 243,022 variants respectively. Intronic variants are most common overall with about the same proportions in both HAAD and KGA datasets of 80% and 77% (for both core and extended genes) respectively. A significant number of variations appear in 3' untranslated (3' UTR) and 5'UTR regions. Coding region variants (non-synonymous and synonymous as annotated

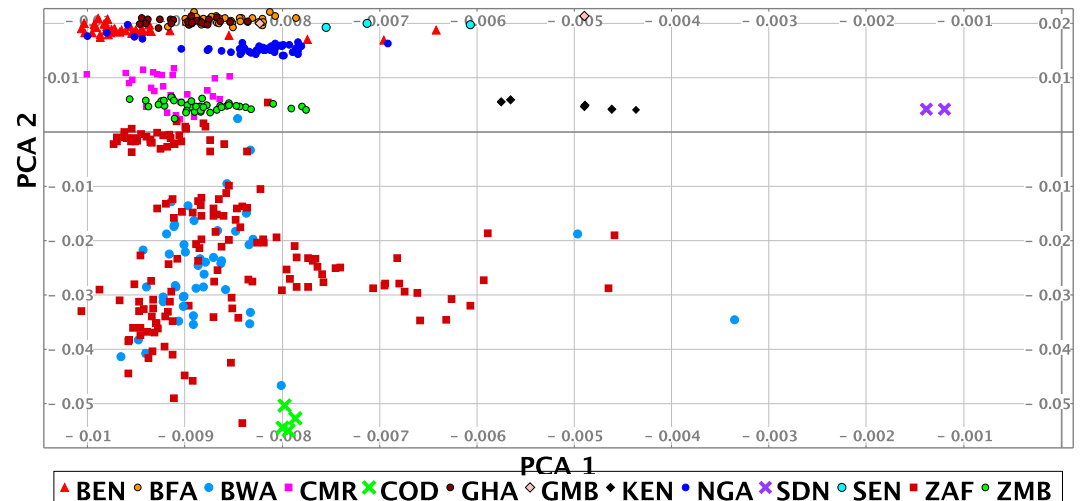

**Fig 2.** Principal component analysis of the HAAD (some outliers are omitted). Abbreviations for sources used are H3A (Human Health and Heredity in Africa Consortium), and SF (Simons Foundation Genome Diversity Project). The countries of origin and source of the samples shown in the PCA are: BEN/H3A, BFA/H3A, BWA/H3A+SF, CMR/H3A, COD/SF, GHA/H3A, GMB/SF, KEN/SF, NGA/H3A+SF, SEN/SF, ZAF/H3A+Tiemessen Lab+SF+South African Human Genome Programme, ZMB/H3A. Country codes given in Fig 1

by VEP v92.0) do not overlap completely between HAAD and KGA groups. For core 93  
genes there were 423 coding variants common to both HAAD and KGA datasets, 288 94  
coding variants unique to HAAD, and 252 unique to KGA. For extended genes, there 95  
were 17,148 coding variants common to HAAD and KGA, 2,850 unique to HAAD, and 96  
2,318 unique to KGA respectively. Care should be taken in comparing HAAD and KGA 97  
data because of the different depth of sequencing. 98

The importance of using and generating African datasets like ours can be seen in our 99  
discovery curves which show the increase in the number of variants found in the core 100  
ADME genes as more genomes are included in the study (the results for the extended 101  
genes are not shown but are similar). Fig 4 compares our data set to 1000 Genomes 102  
African and European populations. The diversity of African populations compared to 103  
European populations is clear and consistent with previous literature [3]. We believe 104  
that the increased richness of our data compared to 1000 Genomes African data is 105  
partially due to the fact that our data is high-coverage. This richness is also likely to be 106  
driven by the significant numbers of southern African genomes that have significant 107  
Khoen and San ancestry (see [11] for some discussion) as well some diverse samples from 108



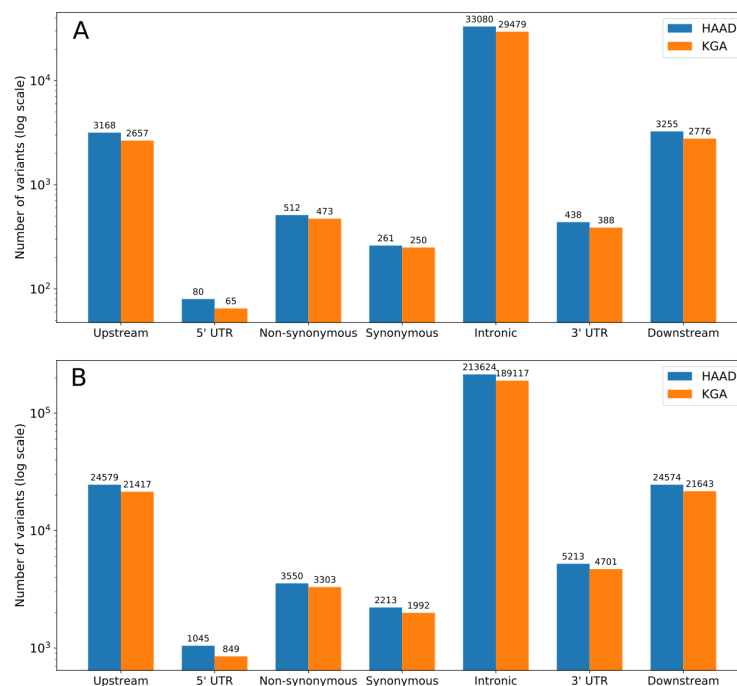

**Fig 3.** Distribution of variant types (as defined by SNPeff annotation) across core (A) and extended (B) ADME gene regions. HAAD (N=458) represents those samples in the jointly called set from the H3A Consortium data, Simons Foundation, SAHGP and Tiemessen Labs, and KGA (n=506) represents the African 1000 Genomes Project populations from the jointly called set. Upstream and downstream regions are represented by 10kb flanks from gene start and end respectively.

the Simons Foundation. Fig 5 shows the discovery curve for the combined African 109  
 (HAAD and KGA) dataset. Although the curve has started to plateau, the results show 110  
 that combining the data sets has value and sampling more Africans and more diverse 111  
 African groups not yet properly captured will reveal considerably more variants. 112

## 2.4 Annotation of high impact coding variants 113

To annotate ADME genes we used the output of an ADME gene optimised annotation 114  
 schema. This schema uses five prediction tools, and variants meeting score cutoffs for all 115  
 five are of the highest confidence for functional impact. We identified 930 high impact 116  
 variants (HI-vars) for 247 ADME genes (from a total of 299 ADME genes) of which 29 117  
 are core genes and 218 are extended genes. Of the core genes, seven members of the 118  
 cytochrome P450 (CYP450) family (*CYP1A1*, *CYP1A2*, *CYP2B6*, *CYP2C8*, *CYP2C19*, 119  
*CYP2A6*, *CYP2D6*) were among those with the highest count of high impact variants. 120  
 Highest counts of the CYP450 genes were seen in *CYP1A1* and *CYP2D6* with 12 and 10 121

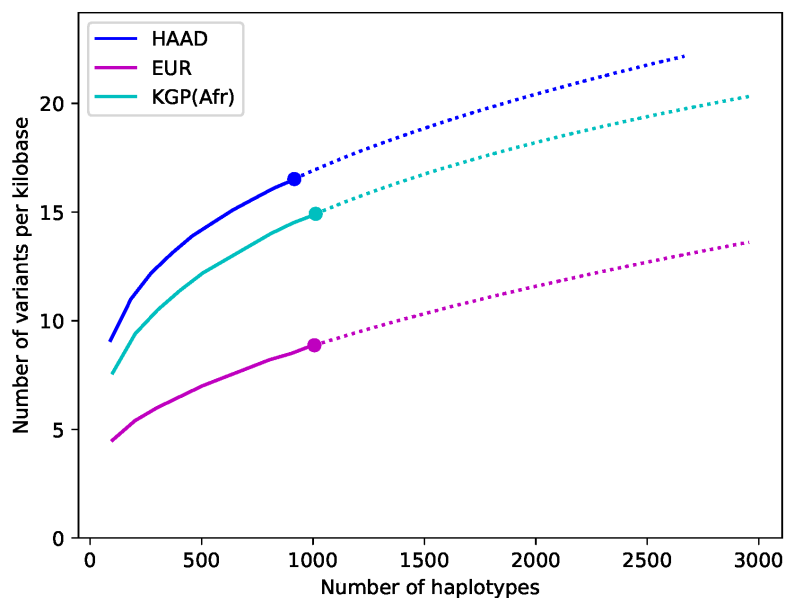

**Fig 4.** Comparative discovery curves of variants in the core ADME genes (including flanks) for the HAAD, and the 1000 Genomes Africa and European data. The results show for a given number of haplotypes the number of variants seen per kilobase. The actual results are shown as a large dot, sub-samples by a solid line, and projections by a dotted line. Sub-samples values are computed averaging over 50 different randomly sampled subsets for intermediate values. Projection is computed using a 3rd order jackknife projection [12].

HI-vars of respectively. The ATP-Binding Cassette (ABC) transporter gene, *ABCB5* 122  
 showed the highest number of HI-vars overall numbering 20. We also counted three 123  
 members of ABCC transporter family and three other members of the CYP450 family in 124  
 the 10 most variable genes. 125

The 930 HI-vars are mostly rare alleles, with most being singletons or doubletons. 126  
 There were only 93 variants with a frequency above 1% in the total joint called samples 127  
 (Fig 6). Overall, the frequency distributions for sub-populations (SA, SC, FW and WE) 128  
 are not uniform. The KS cluster (Khoen and San) is omitted due to low sample number. 129  
 We note the dissimilarity when we consider the granularity of the data. In fact, some of 130  
 the high impact variants tend to show a large disparity in frequency values between 131  
 some clusters. For example, the *CYP27A1* rs114768494 variant (chr2:g.219677301C>T) 132  
 (28th index in Fig 6) is only present in SC and WE with respective frequencies of 1.1% 133  
 and 3.7%. Also, variants can exist in all the sub-populations but with significantly 134  
 different proportions. For instance, the *CYP4B1* rs45446505 variant, 135

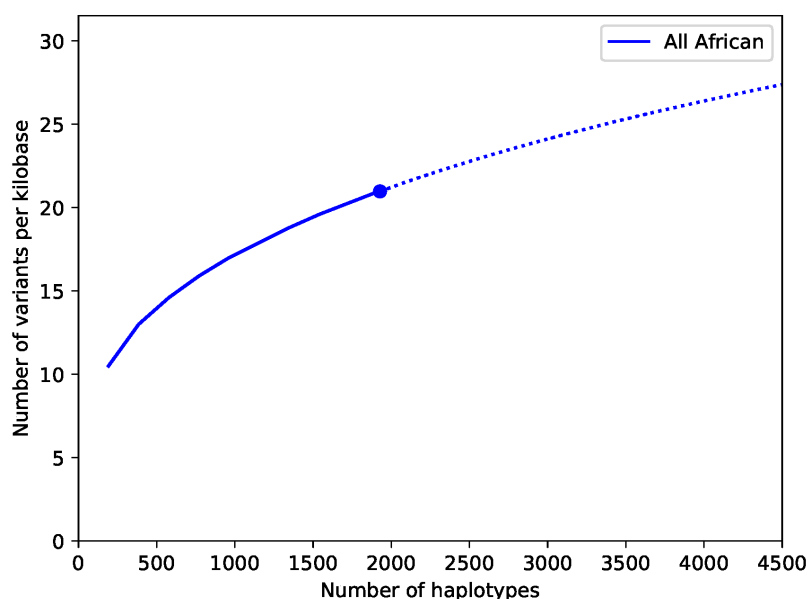

**Fig 5.** Discovery curve of variants in the core ADME genes in the combined HAAD and KGA datasets.

(chr1:g.47279898C>T) (52nd index) is present at frequencies of 9.5%, 2.3%, 4.5% and 3.5% for SA, SC, FW, and WE respectively. Another variant: *CYP4B1* rs3215983, (chr1:g.47280747\_47280747del) (47th index) is common in the SC population with a 10% frequency. This value is at least twice that of other clusters. Frequency differences of  $\approx 10\%$  are observed in common high impact variants.

The regional overlap of the total HI-vars identified shows the majority of these variants are appear in one population cluster only (Fig 7). There are only  $\sim 100$  variants that overlap all African population clusters. These variants appearing in all regions have widely ranging frequencies, with most falling between 1-20% for the total African samples assessed. Each population cluster had  $>110$  variants specific to it. Variants that occur only in one cluster are mostly rare, with an average frequency of less than 1% in their own respective cluster. Southern Africans have 20 cluster-specific variants with frequencies above 1% (20 variant) – more than any other cluster. Relatively fewer variants overlap between two clusters alone, with a trend of geographically close clusters sharing more variants than those which are distant.

Fixation index ( $F_{ST}$ ) assessments revealed that there are inter-cluster differences calculated for HI-vars (Figure 8 A), and also for all ADME gene variants (Fig 8 B). The

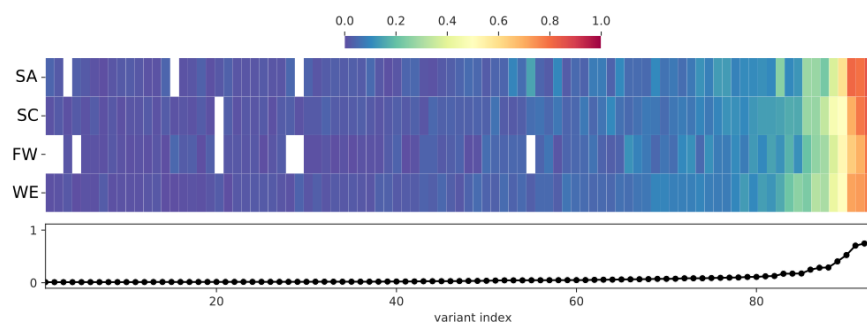

**Fig 6.** Distribution and frequency of HI-vars across sub-populations. Only common HI-vars (Frequency > 1% in the total joint called population dataset) are represented in the figure. The frequency per variant is reported in the lower panel of the figure as a line plot (indexed by frequency). The frequency of each of the variants in each sub-population is given by each heatmap column, with white indicating 0% frequency. See Table 2 for abbreviations

greatest  $F_{ST}$  of all ADME variants is observed between SA and FW populations (0.0125) 153  
and the lowest  $F_{ST}$  is observed between SC and WE (0.003). For  $F_{ST}$  calculated across 154  
HI-vars, these are specific to ADME HI-vars as compared to HI-vars identified in random 155  
genes across the genome (n=2,000). This effect was significant between Far West 156  
Africans and all other clusters. Interestingly, despite being geographically close and 157  
having HI-vars in common, FW and WE clusters show an  $F_{ST}$  value of 0.0042, similar to 158  
the  $F_{ST}$  between the Far West FW and SC cluster, which are geographically distant and 159  
have no common variants – something meriting further study. Both of these differences 160  
show significant  $p$ -values of  $9 \times 10^{-4}$  and  $<10^{-4}$  between FW/WE and FW/SC 161  
respectively.  $F_{ST}$  values for all ADME gene variants overall show higher levels of 162  
differences, none of which, however, seem to be a property of these variants compared 163  
to genetic variants from a random set of genes (all  $p$ -values are non-significant). 164

In summary, we note that HI-vars are not uniform across African clusters, and that 165  
geographical proximity is not a proxy for genetic similarity in ADME genes. 166

## 2.5 CNVs 167

A copy number variant region (CNVR) is determined by aggregating overlapping CNVs 168  
identified in different individuals. A total of 259 CNVRs were identified, consisting of 169  
106 duplications, 106 deletions and 47 mixed CNVRs (i.e. a region that is deleted in 170  
some individuals and duplicated in others) (Table 3). Duplications were further 171

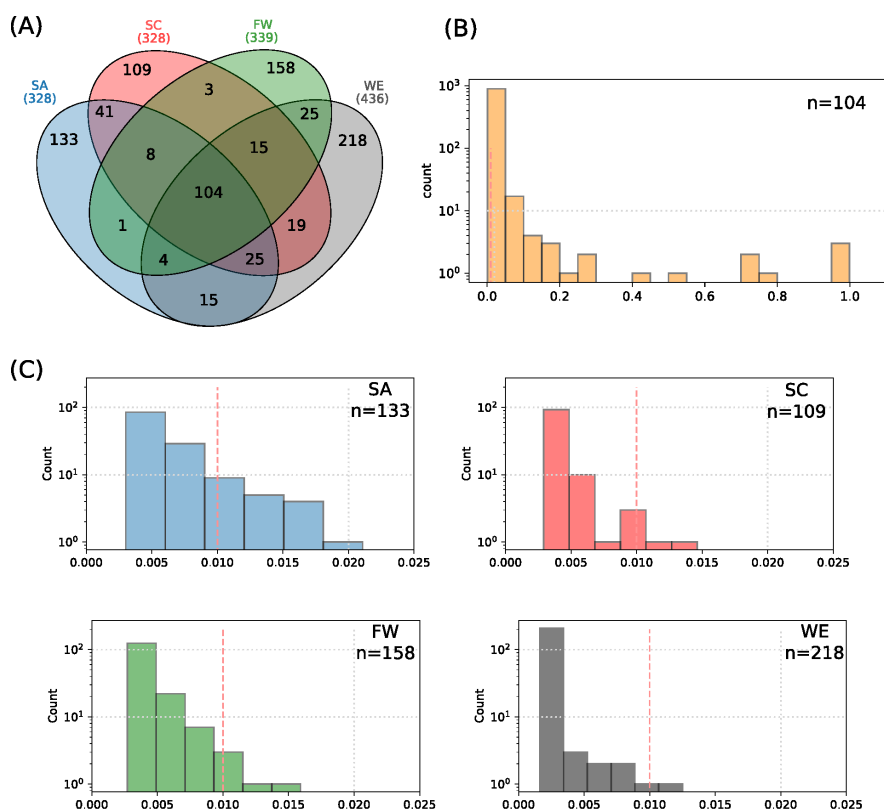

**Fig 7.** Characterisation of the HI-vars in clusters SA, SC, FW, and WE. (A) The Venn diagram shows the overlap between the clusters for these variants. Distribution plots of the frequencies of the common variants between the four clusters (B) and for the unique variants found in each sub-population (C).

separated into biallelic duplications (3 or 4 copies) and multi-allelic duplications (> 4 172  
copies). About 54% of CNVRs were unique, while the remaining CNVRs overlapped with 173  
one or more of the other CNVRs identified. Of the 299 ADME genes that were analysed, 174  
a total of 116 genes (38.8%) contained at least one CNV. These include some important 175  
core pharmacogenes such as the *CYPs*, *UGTs* and *GTs*. Furthermore, the number of 176  
CNVs in ADME genes per individual ranged from four to 71, with the majority of 177  
individuals (89.9%) harbouring between 11 and 30 CNVs. 178

**Table 3.** CNVs identified in core and extended ADME genes (percentages rounded to closest integer).

| CNV Category               | Total     | ADME genes |           |
|----------------------------|-----------|------------|-----------|
|                            |           | Core       | Extended  |
| Deletions                  | 106 (41%) | 30         | 76        |
| Biallelic duplications     | 71 (27%)  | 7          | 64        |
| Multi-allelic duplications | 35 (14%)  | 2          | 33        |
| Mixed CNVs                 | 47 (18%)  | 16         | 31        |
| Total                      | 259       | 55 (21%)   | 204 (79%) |

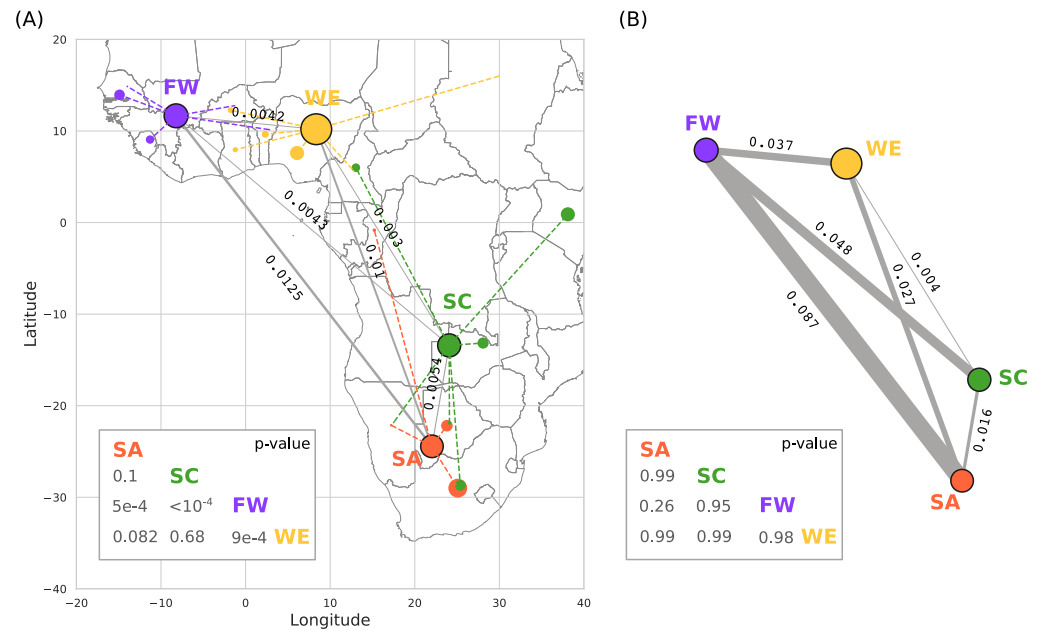

**Fig 8.** Calculation of Fixation index ( $F_{ST}$ ) between the population clusters. We used HI-vars (A) and all ADME variants (B) to compute the weighted  $F_{ST}$  value between each pair of populations using PLINK (version v1.90b6.3). The populations (SA-5) are represented by the geographical centroid of the ensemble of country centroids constituting each cluster. Dashed lines link the centroids of the countries to the cluster centroid. Node radii are proportional to the size of each sample. P-values were calculated from a random  $F_{ST}$  distribution by sampling 917 and 32,0983 variants of a random set of genes ( $n=2,000$ ) for high impact variants and all ADME variants respectively.

## 2.6 Novel and highly differentiated variants

A novel variant in the context of this study is an SNV that is identified in the high coverage African population datasets, and not present in dbSNP (version 151) [13] which aggregates variants from various data sources that include the 1000 Genomes consortium [14, 15], GO-ESP [16], ExAC consortium [17], GnomAD [18] and TOPMED [19].

A total of 343,606 SNVs were called for the ADME genes from the HAAD set of 458 samples, with 12% classified as novel SNPs (Table 4). For the 32 core ADME genes, 5,818 novel variants were identified and a further 34,874 novel variants were identified in the 267 extended ADME genes within the HAAD. The majority of these variant types are intronic or intergenic variants (Fig 9). Of the novel coding variants, 8 were identified as HI-vars in core genes and 88 in extended genes.

The largest number of novel SNVs identified were from populations sampled from

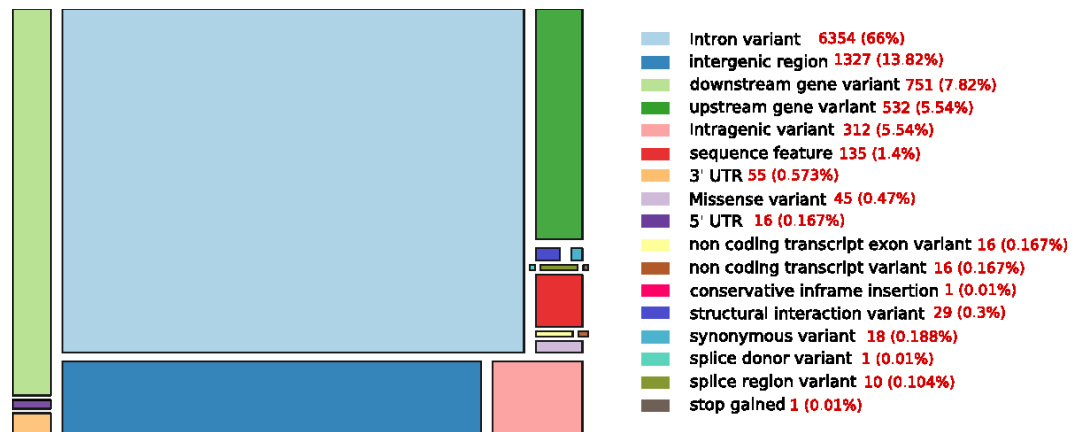

Fig 9. Distribution of ADME novel variant type by overall count.

Table 4. Summary of known and novel variants called from the HAAD for the ADME core and extended genes.

| HAAD ADME called datasets        | Number of SNVs |
|----------------------------------|----------------|
| Known ADME variants called       | 304,666        |
| Novel ADME variants called       | 40,692         |
| Core variants called – known     | 44,039         |
| Core variants called – novel     | 5,818          |
| Extended variants called – known | 260,627        |
| Extended variants called – novel | 34,874         |

the Southern African region (not unexpected as there are no southern African 192  
populations in the KGP). Novel variants in each regional population cluster were 193  
characterised according to their effect as summarised in Table S1. 194

We compared the frequencies of ADME variants seen in the HAAD set as well as in at 195  
least one of the other large databases including 1000 Genomes Consortium, ExAC, 196  
gnomAD and TOPMED. Any variant with a frequency two-fold more or two-fold less in 197  
the HAAD set than in the other datasets was considered as highly differentiated. 198  
Approximately 1,957 ADME variants were highly differentiated in the HAAD data 199  
compared to 1000 Genomes consortium, ExAC, gnomAD and TOPMED datasets. Sixteen 200  
common variants with Minor Allele Frequency (MAF)  $\geq$  1% in eight core genes were 201  
more frequent in HAAD than in the KGP including African populations in those datasets. 202  
One variant in one of the core genes (rs3017670, *SLC22A6*) was seen more commonly in 203  
the other datasets than in the HAAD data (Table S2). In total, 251 core and extended 204  
ADME genes harboured highly differentiated variants, with about 80% of them having at 205  
least 2 highly differentiated variants. 206

We performed a structural analysis of four rare novel HI-vars belonging respectively 207

to *CYP2A13*, *CFTR*, *ABCB1*, and *NAT1* genes, all having an available protein structure from the Protein Data Bank (Fig 10). A variant chr19:g.41595975C>G causes a substitution p.Arg123Gly on *CYP2A13* (PDB code 2PG5) [20]. Mapping this variant on the structure shows a position close to the interaction site belonging to a rigid alpha helix which might affect the binding properties and the local folding integrity.

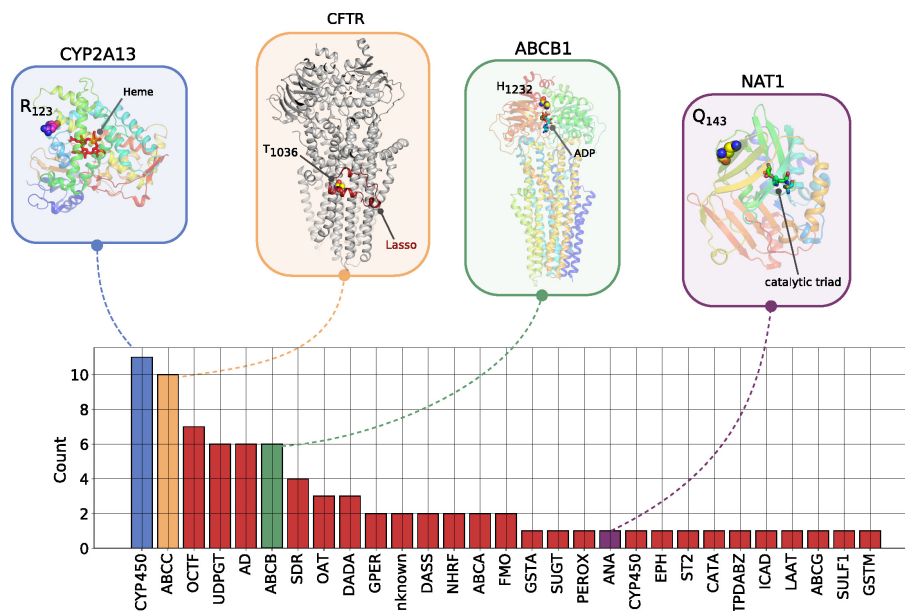

**Fig 10.** The number of novel high impact variants in ADME protein families. Abbreviation for Protein families: CYP450: cytochrome P450, OCTF: organic cation transporter family, UDPGT: UDP-glycosyltransferase, AD: aldehyde dehydrogenase, SDR: short-chain dehydrogenases/reductases, DADA: DAMOX/DASOX, GPFR: glutathione peroxidase, DASS: SLC13A/DASS transporter, NHRF: nuclear hormone receptor family, GSTA: GST alpha, SUGT: Sugar transporter, PEROX: peroxidase, ANA: arylamine N-acetyltransferase, NCYP450: NADPH-cytochrome P450 reductase, EPH: Epoxide hydrolase, ST2: Sulfotransferase 2, CATA: cation transport ATPase, ATPDABZ: ATP-dependent AMP-binding enzyme, ICAD: iron-containing alcohol dehydrogenase, LAAT: L-type amino acid transporter, SULF1: sulfotransferase 1, GSTM: GST Mu. ABCC, ABCB, ABCA, FMO, ABCG are not abbreviated.

For the *CFTR* gene, a chr7:g.117250690A>G causes a substitution p.Thr1036A which is involved in the interaction of the Lasso domain of the protein serving as a critical interaction segment of CFTR with other proteins (PDB code 6MSM) [21, 22]. In addition, this threonine appears to form a pseudoproline-like structure in which the side chain OH is hydrogen bonded to its own backbone NH. This may contribute to the bending of the helix in which this residue is found. Mutation to Ala removes this hydrogen bond and may therefore influence the degree of bending of this helix.



A p.H1232Q protein variant in ABCB1 could affect the interactions of this residue with the ATP molecule required for the active transport process(PDB code 6COV) [23]. In the structure His 1232 lies in a site to which an ATP is bound approximately 5 Å from the ATP gamma phosphate. Although not in direct contact with the ATP, it could interact with it via a network of hydrogen bonds involving water molecules or, if the histidine is protonated, via an electrostatic interaction with the ATP phosphates. A mutation to Gln could affect both types of interaction with the ATP.

The chr8:g.18079983C>T variant creates a premature stop codon in NAT1 gene (PDB code 2LJA). The variant corresponds to the position p.Q143 which is close to the catalytic site of the protein.

We analysed the distribution of the novel variants for the HAAD population cluster (Fig 11). The shared variants are generally exclusive for higher index values, which correspond to higher allele frequencies (Fig 11 A, B) in their respective cluster for both core (Fig 11 C) and extended genes (Fig 11 D). Moreover, we noted that the cluster specific variants cover a big portion of the frequency spectrum: most of them are rare (lower limit of the frequency spectrum).

## 2.7 Potential translational impact of ADME pharmacogenomic variants with known clinical effects

To assess the transferability of variants with known pharmacogenomic effect, we focused on variants with PharmGKB level 1A and 1B clinical annotations. A level 1A annotation denotes a variant-drug combination published as a CPIC guideline or known clinical implementation in a major health system, while a level 1B annotation denotes a variant-drug combination for which a large body of evidence shows an association in the context of altering drug response [24]. (Note that the absence of level 1 annotation may be evidence of lack of study of a variant, especially for African-specific variants, rather than evidence against clinical relevance.) In the entire HAAD set, we identified a total of 21 clinical variants (PharmGKB 1A/B) in 11 ADME genes. Nine of these variants had  $AF \geq 0.05$  in HAAD, while 12 are rarer ( $AF < 0.05$ ). We next compared the frequency of the clinically actionable ADME gene variants in the combined HAAD population with that in the 1000 Genomes super populations as well as gnomAD (Table 5). Notably, two

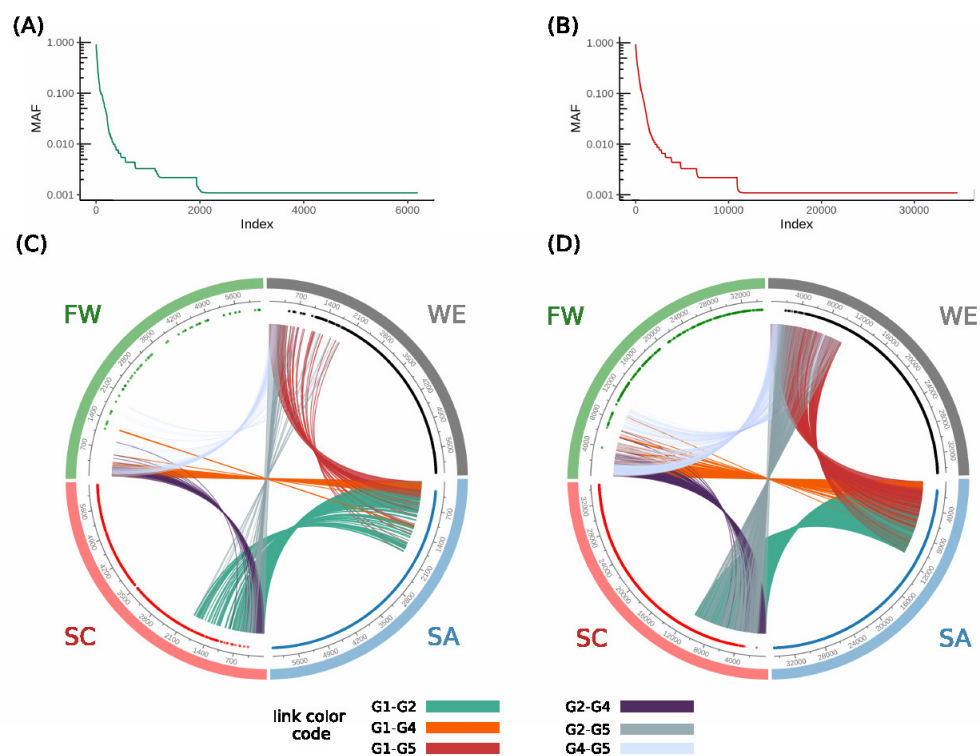

**Fig 11.** Characterisation of novel variant distribution across the ADME genes in HAAD. Variants are indexed by descending MAF for core genes (A) and extended genes (B) for the total population of HAAD samples. Circular plots for core (C) and extended genes (D) show the position of the unique variants per each cluster across the index axes represented by points. The index represents the MAF of the variant in the total HAAD dataset. A link is established if two clusters share the same variant. The FW cluster has fewer variants in common with other clusters in this figure due to low sample number used to generate this figure

variants i.e. *CYP2D6\*17* (rs28371706, AF = 0.2306) and the *CYP3A5\*3* (rs776746, AF = 0.8315), had much higher frequencies in the African populations compared to the non-African KGP super populations as well as the combined gnomAD population. *CYP2D6\*17* has been associated with decreased *CYP2D6* enzymatic activity in African Bantu populations [25].

Some clinically-actionable ADME gene variants common in the non-African KGP super-populations are rare in the HAAD set. These include the variants *SLCO1B1* rs4149056 (*SLCO1B1\*6*), *CYP4F2* rs2108622, *CYP2D6* rs3892097, *CYP2C9* rs1799853 and *CYP2C9* rs1057910. (Table 5).

Furthermore, we evaluated the distribution of level 1A/B PharmGKB variants within the African populations (HAAD and KGP) grouped according to the PCA clusters. Variants which show considerable frequency differences among clusters (SA, SC, FW,

and WE) include *CYP2B6*\*6 (rs3745274), and *CYP2D6*\*17 (rs28371706) (Fig 12A). The number of level 1A/B PharmGKB variants per individual ranged from 0 to 15 (median of 6, 5, 5, and 6 in SA, SC, FW, and WE respectively) (Fig 12B), with 99.8% of individuals carrying at least one such variants.

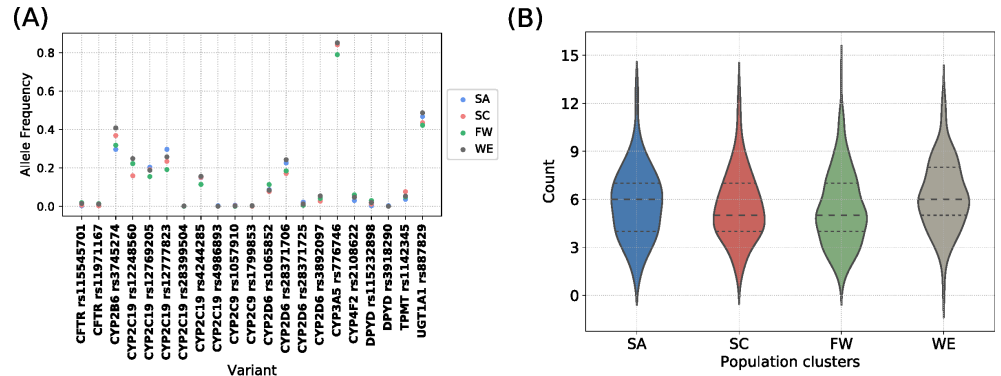

**Fig 12.** Distribution of pharmacogenomic variants with a high level of clinical annotation (PharmGKB level 1A/B). (A) Scatter plot of allele frequency of clinically relevant variants in the PCA clusters. (B) Violin plot of the number of clinically relevant variants carried per individual grouped by the population clusters.

**Table 5.** Allele frequency of the clinically actionable variants (PharmGKB 1A/B) in the combined HAAD dataset compared to the KGP super populations<sup>k</sup> as well as gnomAD. AFR: African, European: EUR, AMR: Ad Mixed American, EAS: East Asian, SAS: South Asian.

| dbSNP ID    | Gene/Star allele | Variant type          | Allele Frequency |                  |                  |                  |                  |                  |        |
|-------------|------------------|-----------------------|------------------|------------------|------------------|------------------|------------------|------------------|--------|
|             |                  |                       | HAAD             | <sup>k</sup> AFR | <sup>k</sup> AMR | <sup>k</sup> EUR | <sup>k</sup> EAS | <sup>k</sup> SAS | gnomAD |
| rs35742686  | CYP2D6 (*3)      | Frameshift            | 0,00             | 0,00             | 0,01             | 0,02             | 0,00             | 0,00             | 0,01   |
| rs3892097   | CYP2D6 (*4)      | Splice acceptor       | 0,04             | 0,06             | 0,13             | 0,19             | 0,00             | 0,11             | 0,14   |
| rs5030655   | CYP2D6 (*6)      | Frameshift            | 0,00             | 0,00             | 0,00             | 0,02             | 0,00             | 0,00             | 0,01   |
| rs1065852   | CYP2D6 (*10)     | Missense              | 0,08             | 0,11             | 0,15             | 0,20             | 0,57             | 0,17             | 0,21   |
| rs28371706  | CYP2D6 (*17)     | Missense              | 0,23             | 0,22             | 0,01             | 0,00             | 0,00             | 0,00             | 0,01   |
| rs28371725  | CYP2D6 (*41)     | Intron variant        | 0,01             | 0,02             | 0,06             | 0,09             | 0,04             | 0,12             | 0,08   |
| rs1799853   | CYP2C9 (*2)      | Missense              | 0,00             | 0,01             | 0,10             | 0,12             | 0,00             | 0,03             | 0,09   |
| rs1057910   | CYP2C9 (*3)      | Missense              | 0,01             | 0,00             | 0,04             | 0,07             | 0,03             | 0,11             | 0,06   |
| rs1277823   | Intergenic       | Intergenic            | 0,25             | 0,25             | 0,11             | 0,15             | 0,31             | 0,36             | 0,19   |
| rs12769205  | CYP2C19 (*2)     | Intron variant        | 0,18             | 0,20             | 0,11             | 0,15             | 0,31             | 0,36             | 0,18   |
| rs4244285   | CYP2C19 (*2)     | Synonymous            | 0,15             | 0,17             | 0,11             | 0,15             | 0,31             | 0,36             | 0,18   |
| rs4986893   | CYP2C19 (*3)     | Stop gained           | 0,00             | 0,00             | 0,00             | 0,00             | 0,06             | 0,01             | 0,01   |
| rs28399504  | CYP2C19 (*4)     | Start lost            | 0,00             | 0,00             | 0,00             | 0,00             | 0,00             | 0,00             | 0,00   |
| rs56337013  | CYP2C19 (*5)     | Missense              | 0,00             | -                | -                | -                | -                | -                | <0,001 |
| rs72552267  | CYP2C19 (*6)     | Missense              | 0,00             | -                | -                | -                | -                | -                | <0,001 |
| rs41291556  | CYP2C19 (*8)     | Missense              | 0,00             | 0,00             | 0,00             | 0,00             | 0,00             | 0,00             | 0,00   |
| rs12248560  | CYP2C19 (*17)    | Upstream gene variant | 0,20             | 0,24             | 0,12             | 0,22             | 0,01             | 0,14             | 0,21   |
| rs776746    | CYP3A5 (*3)      | Splice acceptor       | 0,83             | 0,82             | 0,20             | 0,06             | 0,29             | 0,33             | 0,26   |
| rs3745274   | CYP2B6 (*6)      | Missense              | 0,37             | 0,37             | 0,37             | 0,24             | 0,22             | 0,38             | 0,27   |
| rs2108622   | CYP4F2           | Missense              | 0,04             | 0,08             | 0,24             | 0,29             | 0,21             | 0,41             | 0,27   |
| rs3918290   | DPYD             | Splice donor          | 0,00             | 0,00             | 0,00             | 0,01             | -                | 0,01             | 0,01   |
| rs115232898 | DPYD             | Missense              | 0,02             | 0,02             | 0,00             | 0,00             | 0,00             | 0,00             | 0,00   |
| rs116855232 | NUDT15           | Missense              | 0,00             | 0,00             | 0,04             | 0,00             | 0,10             | 0,07             | 0,03   |
| rs1800462   | TPMT (*2)        | Missense              | 0,00             | 0,00             | 0,01             | 0,01             | 0,00             | 0,00             | 0,00   |
| rs1142345   | TPMT (*3A & C)   | Missense              | 0,04             | 0,07             | 0,06             | 0,03             | 0,02             | 0,02             | 0,04   |
| rs1800460   | TPMT (*3A & B)   | Missense              | 0,00             | 0,00             | 0,04             | 0,03             | 0,00             | 0,00             | 0,03   |
| rs1800584   | TPMT (*4)        | Splice acceptor       | 0,00             | -                | -                | -                | -                | -                | <0,00  |
| rs887829    | UGT1A1           | Upstream gene variant | 0,49             | 0,49             | 0,38             | 0,30             | 0,13             | 0,44             | 0,36   |
| rs4149056   | SLCO1B1          | Missense              | 0,00             | 0,01             | 0,13             | 0,16             | 0,12             | 0,04             | 0,13   |
| rs115545701 | CFTR             | Missense              | 0,01             | 0,02             | 0,00             | 0,00             | 0,00             | 0,00             | 0,00   |
| rs11971167  | CFTR             | Missense              | 0,01             | 0,02             | 0,00             | 0,00             | 0,00             | 0,00             | 0,00   |
| rs202179988 | CFTR             | Missense              | 0,00             | 0,00             | 0,00             | 0,00             | 0,00             | 0,00             | <0,00  |

## 2.8 Regulatory variation

There were 54 genetic variants across our African data sets in non-coding regions that have significantly higher prevalence than in the KGP overall data set (Table S3).

Fig S3 illustrates differences between population cluster pairs using  $F_{ST}$  scores. In most cases, the variability is not greater between pairs of population clusters ( $F_{ST}$  close to zero). We omit KS (Khoen and San) due to low sample size in this cluster.

## 2.9 Runs of homozygosity

Runs of homozygosity (ROH) are areas in the genome where an individual has two identical copies of the genome due to shared ancestors on the maternal and paternal lines. The size of the ROH correlates with how recent the shared ancestor was. With high coverage data, we are able to detect ROHs of at least 300kb in size. High ROH is a measure of inbreeding decreased fitness and may be associated with ill health [26, 27]. However, ROH are not randomly distributed across the genome and *islands of homozygosity* (ROHi) are known to exist: regions where the ROH of several individuals within a population overlap [28]. There is some evidence that these islands are found as a result of positive selection.

There are a total of 634 ROH in the sample. The key metrics we use are the size of ROHi (that is, how many individuals are in the ROHi) and size normalised by size of gene (ROHi/kb). The genes which have largest ROHi and ROHi/kb are *CYP1A1*, *CYP1A2*. The *ABCB1* and *DPYD* genes are relatively large genes and have a large ROHi. Tables S4 and S5 show a summary of the ROH found in the core and extended genes in our data sets. The range of ROHi/kb varies significantly across all genes in the genome. Fig S4 shows a violin plot of the range of ROHi/kb in the core, extended, and all other genes in the genome. Statistical comparison is difficult because ranges are not normally distributed and a small number of extreme values skew the averages.

## 2.10 Coverage of ADME variants on SNV genotyping arrays

To evaluate whether genotyping array chips are suitable for detection of relevant ADME variants in African populations, we compared our whole genome sequencing variants with those captured by current arrays. Table 6 on page 21 shows the coverage of the

**Table 6.** Variant coverage and overlap for core gene variants detected in HAAD whole genome sequencing datasets vs those captured by the Omni and the MEGA arrays. WGS=number of variants in the whole-genome data, Chip=number of variants in the chip, % cov= the percentage of SNPs at that MAF in WGS data that are covered by the array.

| MAF | WGS   | Omni |       | MEGA |       |
|-----|-------|------|-------|------|-------|
|     |       | Chip | % cov | Chip | % cov |
| 1   | 18660 | 640  | 3.4   | 349  | 1.9   |
| 2   | 13835 | 574  | 4.1   | 298  | 2.2   |
| 3   | 11335 | 522  | 4.4   | 242  | 2.1   |
| 4   | 9714  | 457  | 4.7   | 204  | 2.1   |
| 5   | 8886  | 409  | 4.6   | 179  | 2.0   |
| 10  | 6271  | 262  | 4.2   | 135  | 2.2   |

**Table 7.** Variant coverage and overlap for extended gene variants detected in HAAD whole genome sequencing datasets vs those captured by the Illumnia Human Omni 2.5.8 array

| MAF | WGS vars | Omni  |       | MEGA |       |
|-----|----------|-------|-------|------|-------|
|     |          | Chip  | % cov | Chip | % cov |
| 1   | 120660   | 11457 | 9.5   | 5743 | 4.8   |
| 2   | 94651    | 11031 | 11.7  | 5256 | 5.6   |
| 3   | 80585    | 10588 | 13.1  | 4937 | 6.1   |
| 4   | 71480    | 10220 | 14.3  | 4638 | 6.5   |
| 5   | 64475    | 9859  | 15.3  | 4414 | 6.8   |
| 10  | 43228    | 8069  | 18.6  | 3555 | 8.2   |

variants that we detected in the core ADME genes in the WGS data compared to the  
 Illumina Human Omni 2.5.8 (Omni) and the Illumina Infinium Multi-Ethnic AMR/AFR-8  
 Kit (MEGA). The Omni is a 2.39 million SNP array commonly used in human GWAS  
 work – previous unpublished work shows that this is one of the best performing arrays  
 on African populations. The MEGA array is 1.43 million SNP array optimised for African  
 and Hispanic American populations (and can be augmented with approx. 200k user  
 selected SNPs). For different minor allele frequencies of variants we detected (MAF) we  
 show the number of variants that are at least at that threshold, the number of those  
 variants captured by probes by the two arrays, and the percentage of the variants that  
 are captured. As can be seen, even at relatively high frequencies, less than 5% of the  
 variants are captured by the array for core genes, and less than 8% for extended genes.  
 As expected the larger Omni does a better job. However, of the 93 common HI-vars, only  
 19 (20%) are on the Omni chip whereas 50 (54%) are on the MEGA.

### 3 Discussion

Next generation technologies have provided pharmacogenomics and precision medicine a major increase in their application for disease treatment and drug safety [29]. ADME genes have been a focus due to their critical role in pharmacodynamics and pharmacokinetics. Our work presents the first study characterising the pharmacogenomics landscape of ADME genes in sub-Saharan Africa using high coverage whole-genome sequencing data which has been collected from different sources. The study's main aim was to assess the variability of ADME genes across Africa and if this could have a significant impact on protein function and other pharmacologic properties and thus the potential impact on drug response.

We focus mainly on four African clusters distinguished geographically and genetically as shown by the PC whole-genome analysis. Overall assessments of structural and regulatory variation were evaluated across the complete dataset, while coding variants were assessed for functional impact. The applicability of known clinical variants and current genotyping technologies was also assessed.

In both novel variant and HI-vars analysis, our study demonstrates a significant level of variability. Most of the variants are rare and are population-specific in accordance with previous studies due mainly to increased population size and to a weak negative selection [24,30–32]. Our high coverage data are adequate to genetically characterise these types of variants at high confidence levels. Evaluations of the false discovery rate of rare variants were previously estimated between 3.6% to 6.3% depending on the platform [33]. Therefore a broad extrapolation from our results is that there are between 30 to 60 false positive variants in our HI-vars. In the context of ADME pharmacogenes, although not all variants identified may prove to have functional impact, those that do may have significant consequences in dictating the drug-host response for individuals.

Our  $F_{ST}$  calculation highlights the differences between clusters. Calculation using all ADME variants led to values similar to results obtained for multiple sub-Saharan African ethnic groups that used 328,000 independent SNPs [34]. Genetic distance did not always correlate with geographical distance and in some pairs of clusters, the distance seems to be more significant in ADME genes. In the absence of clear evidence, it is not

trivial to explain why two geographically close clusters like FW and WE, share a  
comparable degree of divergence like the pair FW-SC. Therefore, using  
ethno-geographical properties as a proxy to discriminate the pharmacogenomics  
landscape might be inaccurate.

In addition, the important number of cluster-specific novel and high impact rare  
variants suggest that strategies limited to studies of high-frequency alleles might be  
considered as an over-generalisation to a more complex pharmacogenomic landscape in  
sub-Saharan Africa. In fact, our work highlights a “genetic diversity bottleneck” for  
precision medicine applications, requiring a balance between variants useful for  
population-based applications (for a particular cluster of Africans) and between the  
potential impact posed by variants unique to the individual. Therefore, the complexities  
of variant interpretation and reporting in PGX testing [35] may be exacerbated by the  
complex African ADME landscape.

While some variants have similar frequencies in European and African populations,  
our assessment of the top-level clinically validated variants shows that these variants are  
more common in European populations than in African populations. This trend may be  
the result of the PGx knowledge bias towards European populations, with most variation  
in African and other global populations still largely uncharacterised in terms of PGx  
effect. Some variants show an opposite trend, such as the *CYP3A5*\*3 rs776746 and  
*CYP2D6*\*17 rs28371706, which are much more common in Africans than Europeans.  
These enzymes are known to be key metabolisers of a large number of drugs, and these  
two variants (as they are common) will impact the reliability of using a European based  
PGx strategy in African populations. Key drugs that may be affected by those variants  
are codeine [36], primaquine [7] (*CYP2D6*), and tacrolimus [37] (*CYP3A5*). We also see  
an interesting example of *SLCO1B1* rs4149056, which was seen in the KGP African  
populations (albeit rarely), which is not seen in the HAAD samples. This further  
reiterates the need for additional African sequences, as publicly accessible African  
genomic data cannot remain represented by the KGP alone. The greatest genomic  
coverage of African populations to date is available in genotyping array format [38].  
These methods are unable to adequately characterise rare ADME variants at high  
confidence levels compared to high coverage WGS datasets. Moreover, we have also  
detected a large number of copy number variants, and were able to do so robustly with

our high coverage sequencing data as compared to other methods [39]. The distribution of copy number variants and their impact on the ADME landscape in Africans is currently ongoing and will be available in a separate publication. As the state of data availability and type remains in flux, precision medicine approaches in Africa will be limited. In an ideal scenario, high coverage long read WGS will be used for more African samples undergoing clinical trials, as this allows for accurate resolution of haplotypes (including novel haplotypes), and thus, clearer interpretations of their potential impact on drug response.

## 4 Conclusion

Our work highlights that the ADME landscape in African populations is diverse, and shows the importance of rare variation held within individual population clusters. Therefore current array-based genotyping technologies have severe limitations to be applied as the high throughput method in precision medicine applications. As sequencing technology becomes more accessible and cheaper, characterisation of rare variants would benefit from the ongoing progress. Targeted sequencing and whole-exome sequencing would be better suited for characterising ADME genes. Moreover, a previous suggestion to consider intra-ethnic genetic characterisation in drug-development [8] might not be appropriate for sub-Saharan Africa due to the important presence of singletons and the subjective assigning of ethnicity for individuals. The “genetic diversity bottleneck” in precision medicine might increase the burden of developing targeted therapies at sub-population levels because of the weak presence of common genetic patterns. However, these patterns might exist at the functional and phenotypic levels which might help to stratify the populations to clusters sharing common pharmacokinetic properties for a given drug. In this context, a proposed plan would integrate genotypic and phenotypic data into predictive models to unveil these patterns.

Capacity building efforts for pharmacogenetics and pharmacogenomics research in Africa is important. Strategies and policies for development of science and technology must ensure a future where Africa can take an active role in harnessing the power of genomic research in addressing its healthcare challenges. Promising positive steps are



being taken with the establishment of initiatives such as the Human Heredity and Health 402  
in Africa project (<http://h3africa.org/>) that aims at strengthening research capacity 403  
for genomics in Africa. 404

**Limitations** There are many limitations of our work. The most obvious is the need for 405  
significantly more genomic data from Africa. Although, more samples are necessary 406  
generally, there is a particular need for more diverse sampling. We focus on sub-Saharan 407  
Africa, omitting northern Africa completely. We only had limited numbers of samples 408  
from Nilo-Saharan and Afroasiatic language speakers as well as speakers of non-Bantu 409  
languages in central, southern and eastern Africa (such as San and Khoe speakers). 410  
However, with more samples, we expect our conclusions to hold and the additional 411  
benefit would be a clearer resolution of the PGx landscape in diverse sub-clusters. 412  
Ideally, we would have merged the 1000 Genomes African data and the HAAD data set 413  
and done a combined analysis. However, the bulk of the 1000 Genomes WGS is 414  
low-coverage while the HAAD set is high-coverage which complicates comparative work 415  
significantly. As more data becomes available, this challenge will become easier. The 416  
discovery curve shown in Fig 5 shows we can expect to find many more variants when 417  
they are sequenced. Besides lack of genomic data, despite the effects of groups of 418  
excellence across Africa we have cited there is very little clinical and drug response data 419  
for African populations. Without this it will be difficult to associate the functional effect 420  
of variants to the clinical phenotypes. All of this costs money and requires scarce skills. 421  
Collaborations like ours, which has brought a diverse group of African scientists together 422  
show the potential of what can be done. 423

**Strengths** Our work investigates novel African datasets and combines these with 424  
established African sequences to assess as broad an overview of African ADME variation 425  
as possible. This work could lay the foundations for motivation of more PGx related 426  
studies in Africans. We applied diverse computational assessment methods to mine the 427  
data and retrieve valuable genomic information. This can assist in guiding future 428  
research in resource scarce environments. 429

## 5 Methods

### 5.1 Data

*H3A Consortium set* contains 272 samples selected and sequenced for the Human Heredity and Health in Africa (H3Africa) project. Samples cover populations from Benin, Burkina Faso, Botswana, Cameroon, Ghana, Nigeria and Zambia. Samples were shipped to the Human Genome Sequencing Center (HGSC) at Baylor College of Medicine (BCM), Houston, USA, under signed material transfer agreements from each project. Samples were prepared using the TruSeq Nano DNA Library Prep Kits and underwent whole genome sequencing on an Illumina TenX (150 bp) to a minimum depth of coverage of 30 $\times$ .

*AWI-Gen set* consists of 100 South Eastern Bantu-Speakers (40 $\times$  coverage).

*Cell Biology Research Unit, Wits set* consists of 40 samples from Soweto/Johannesburg South Africa (39 black and 1 mixed ancestry). Library preparation and sequencing was done at Edinburgh Genomics, Edinburgh, Scotland. Library preparation was done using the TruSeq Nano protocol and high coverage sequencing ( $\sim$ 30 $\times$ ) was done utilising the Illumina SeqLab workflow system and the Illumina HiSeqX platform.

The *SAHGP set* is a collection of 15 samples from the South African Human Genome Programme [11]. Two main Bantu-speaking ethno-linguistic groups were included: The Sotho (Sotho-Tswana speakers;  $n=8$ ) and the Xhosa speakers (Nguni language;  $n=7$  recruited from the Eastern Cape Province). The DNA samples were normalised to  $\sim$ 60 ng/ $\mu$ l and  $\sim$ 5  $\mu$ g DNA was submitted to the Illumina Service Centre in San Diego, California, for sequencing on the Illumina HiSeq 2000 instrument (101 bp paired-end reads,  $\sim$ 314 bp insert size) with a minimum read depth of coverage of 30 $\times$  [11].

*SGDP set* contains 34 African samples selected from 300 individuals from the Simons Genome Diversity Project. Samples include populations from Congo, Namibia, Kenya, Senegal, Algeria, Nigeria, Gambia, Sudan and South Africa. Samples were sequenced at an average depth of 43 $\times$  at Illumina Ltd; almost all samples were prepared using the same PCR-free library preparation [40].

*1000 Genome African set* consists of 507 African samples from 1000 Genomes Project. These samples include Gambian Mandinka, Mende from Sierra Leone, Yoruba from

Ibadan, Nigeria, Esan from Nigeria and Luhya from Webuye, Kenya. Libraries were constructed on either Illumina HiSeq2000 or GAIIX with the use of 101 base pair end reads. Sequencing was done at an average depth of  $4\times$  [15].

The only phenotype made available to us was sex. In particular, self-identified ethnicity, location in the country, and disease status were not revealed.

## 5.2 Data processing

Table 8 shows the individual steps involved in creating the final joint called VCF of 966 samples.

**Table 8.** Processing done on individual samples and jointly. Tool versions are included.

|                          | BAM<br>creation                                                     | GVCF<br>creation | Combine<br>GVCF | Genome<br>calling |
|--------------------------|---------------------------------------------------------------------|------------------|-----------------|-------------------|
| Tiemessen<br>Lab         | bwa-0.7.17, samtools-1.9, GATK v4.0.8.1                             |                  |                 |                   |
| AWI-Gen                  | bwa-0.7.17, samtools-1.9, GATK v4.0.8.1                             | GATK v4.0.8.1    | GATK            | GATK              |
| H3Africa Con-<br>sortium | bwa-0.7.10, samtools/0.1.19/<br>picard-<br>tools-1.119, GATK v3.3-0 | v4.0.8.1         | v4.0.8.1        | v4.1.3.0          |
| 1000<br>genomes          | bwa-0.5.9, picard-tools-1.53, samtools-<br>0.1.17, GATK v1.2-29     |                  |                 |                   |
| African<br>SAHGP         | bwa-0.7.10, samtools/0.1.19/<br>picard-<br>tools-1.119, GATK v3.3-0 |                  |                 |                   |
| SGDP                     | bwa-0.7.10                                                          |                  |                 |                   |

Most of the datasets mentioned had BAMs mapped against GRCh37 (also known as hs37d5) available. If BAMs were not available mapping was done from Fastqs. For all of the BAMs bwa-mem was used to do the alignment and Picard or GATK was used to MarkDuplicates and GATK was used to do Base Quality score recalibration for most of the cases. The only difference was the version of the specific tools being used in the alignment process.

From the BAMs we called gVCFs using HaplotypeCaller in gVCF mode using GATK v4.0.8.1. We combined all the gVCFs into one combined gVCF using GATK's CombineGVCF (v4.0.8.1). From the combined gVCF we did joint calling using GenotypeGVCFs (v4.1.3.0) and followed GATK's best practice for variant quality score recalibration for SNPs and INDELS. After applying VQSR we filtered for all the high quality (PASS) sites and used the VCF. The final VCF was used for downstream analysis. All code can be accessed at <https://github.com/h3abionet/recalling>.

### 5.3 Population structure

Population structure was computed using the autosomal data in our samples together with reference data sets in order to ensure a relatively unbiased structure. We included all 1000 Genomes Project African data, and two non-African 1000 Genomes Project sets (Utah residents (CEPH) with Northern and Western European ancestry – CEU – and Bengali in Bangladesh – BEB) and some chip data from various projects. Only unambiguous, biallelic SNPs (A/C, A/G, C/T, G/T) common in all data sets were used. The data was merged and pruned using PLINK [41], leaving 401k SNPs for analysis. Principal components were computed using PLINK and structure charts were produced using ADMIXTURE [42] (30 independent runs for each value of  $k$ ) and averaged using CLUMPP [43]. All charts were produced with Genesis [44].

Population clusters were determined from the PCA values rather than from the project and self-identification labels due to overlapping data. The optimal number of clusters was determined using the method of Solovieff *et al.* [45], and clusters determined using  $k$ -means clustering with the R MASS package [46]. In analyses in which population clusters were compared, we only used the samples that appeared in the clusters (e.g., excluding Algerian, San samples). In all other analyses all the data was used. Choudury *et al.* [9] discusses the population structure of the H3A data in more detail.

### 5.4 ADME gene selection

ADME genes as defined by PharmADME (<http://pharmaadme.org>) (both core and extended definitions) were extracted using current genomic co-ordinates for GRCh37.p13, as obtained through BioMart [47]. Gene flanking regions were included in the extraction (10 000 bp upstream from gene start and downstream from gene end).

### 5.5 Annotation and Functional Prediction

Variants were classified and typed using SnpEff v4.3t [48] with the GR37Ch base reference for canonical gene transcripts. Variant Effect Predictor (VEP) v92.0 [49] was used for functional prediction based annotation. VEP was configured with dbNSFP v3.0 [50], a large database used to retrieve functional prediction scores for coding

variants. The annotation analysis is implemented in `g_miner` workflow 510  
([https://github.com/hothman/PGx-Tools/tree/master/workflows/g\\_miner](https://github.com/hothman/PGx-Tools/tree/master/workflows/g_miner)). An 511  
optimised model for functional prediction of pharmacogene variants produced by Zhou 512  
et al [51] was used as the basis for high impact classification of missense variants. The 513  
model uses five toolsets (LRT, MutationAssessor, PROVEAN, VEST3 and CADD). Loss of 514  
Function variants were classified as high impact if they were present in the canonical 515  
transcript of the gene. Singleton or doubleton high impact variants were filtered based 516  
on their VCF QUAL scores, using a cutoff of  $> 50$ . Any variant that did not match such 517  
criteria was removed prior to subsequent analyses with `bcftools v1.9` [52]. Three HI-vars 518  
were not displayed in Fig 6 due to incorrect reference alleles inducing an erroneous 519  
frequency: ALDH3B1 rs11433668 and rs58160034; and ADH1C – rs283413. We have 520  
checked these variants in 1000 Genomes Project and gnomAD datasets to validate the 521  
error. 522

## 5.6 Fixation Index ( $F_{ST}$ ) analysis between population clusters 523

Differences between African subgroups were calculated by `PLINK v1.9` [41], using mean, 524  
weighted  $F_{ST}$  between each pair of the population clusters. Prior to the calculation we 525  
applied linkage disequilibrium (LD) based pruning using `PLINK v1.9` for different sets of 526  
variants: High Impact ADME, High Impact non-ADME, all ADME gene regions, and a set 527  
of 2000 random non ADME genes. The parameters used for this step are as follows: 528  
window size = 1000; step size = 5 and variance inflation factor = 2. 529

## 5.7 CNVs 530

Discovery and genotyping of CNVs was performed using `GenomeSTRiP's` 531  
`SVPreprocessing` and `CNVDiscovery` (`svtoolkit 2.00.1918`) pipelines using the default 532  
parameters for genomes sequenced at 30-40 $\times$  coverage [53]. 533

## 5.8 Regulatory analysis 534

Genetic variants from ADME core genes were filtered for those meeting all the following 535  
criteria: in any non-coding region (10,000 bp up and downstream from canonical 536

transcript); MAF >0.01; CADD-PHRED score  $\geq 10$  [54]; and binomial  $p$ -value compared with the entire 1000 Genomes Project data set < 0.05.

We compared these genetic variants (Table S3) for variability within pairs of populations as compared with the entire 1000 Genomes data set using  $F_{ST}$  scores [55]. Since the number of genetic variants is small, we do not stratify it further into specific regulatory elements.

## 5.9 Runs of Homozygosity

Regions of homozygosity in core and extended gene sets were identified with using PLINK [41], using settings consistent for high-coverage data [26], viz. `--homozyg-snp 30; --homozyg-kb 300; --homozyg-window-snp :30; --homozyg group-verbose:`.

## Ethics approval and consent to participate

No new data was generated specifically for this project – this is secondary analysis of data that had been generated and studied for other purposes. The H3A AWI-Gen Study (H3A data from Ghana, Burkina Faso and South Africa) was approved by the Human Research Ethics Committee (Medical) of the University of the Witwatersrand (Wits) (protocol numbers M121029 and M170880), and each contributing Centre obtained additional local ethics approval, as required. The H3A Benin study was approved by the Comité d'éthique de la recherche, Université de Montréal. The H3A CAfGEN study (Botswana) was approved by the IRB of the Ministry of Health of the Republic of Botswana (PPPME-13/18/1). The H3A TrypanoGEN Study (Cameroon component) was approved by the Comité National D'Ethique de la Recherche pour la Santé Humaine of the Republic of Cameroon (No 2013/11/364/L/CNERSH/SP). The H3A ACCME Study (Nigeria) was approved by the National Health Research Ethics Committee of Nigeria (NHREC/01/01/2007-29/11/2016). The H3A TrypanoGEN Study (Zambian component) was approved by the Biomedical Research Ethics Committee of the University of Zambia (FWA00000338). The data from the Cell Biology Research Lab, NICD/Wits was generated by a study approved by the Wits Human Research Ethics (Medical) Committee (protocol number M140926).

## Availability of data and materials

The data from the 1000 Genomes Project is publicly accessible from <https://www.internationalgenome.org/data/>. The Simons Genome Diversity Project data is available from EGA EGAS00001001959 and the Southern African Human Genome Project is available at EGAS00001002639 in EGA. The data from the Cell Biology Research Lab, NICD/Wits is available from Caroline Tiemessen (carolinet@nicd.ac.za) on reasonable request, subject to ethics approval. The South African data from the AWI-Gen project is available from Michèle Ramsay (michele.ramsay@wits.ac.za) on reasonable request (and will be deposited in EGA). All other datasets used in this study are available from the Human Heredity and Health in Africa (H3Africa) submission to EGA – EGAC00001000648.

## Competing interests

SB, MC, CC, ASG, PT and FJG are all employees of GlaxoSmithKline.

## Funding

This work was primarily funded through a grant by GlaxoSmithKline Research & Development Ltd to the Wits Health Consortium.

## Authors' contributions

JdR led the writing of the paper with assistance from HO. GB was responsible for the joint calling of the data and QC. JdR, HO, GB, SP, MM, SH contributed to the genomic data analysis. LC was primarily responsible for copy number variation analysis. DT and SA studied the transferability of ADME pharmacogenomic variants. PM provided the analysis of the regulatory regions. BD, DT, FMF, PM, MM, SP, GW, and SH all contributed to writing. SB, MC, CC, ASG, GS, CA, MoM, MR, GS, MS, CT and PT provided the critical analysis of the paper and contributed to writing. SH proposed the project, coordinated the work and co-led it with FJG. All authors contributed to writing the manuscript, and read and approved the final manuscript. This paper describes the views of the authors in their personal capacities and does not necessarily represent the

official views of the funders.

592

## Acknowledgements

593

We thank the generous collaboration of the H3A AWI-Gen, CAfGEN, and TrypanoGEN group, the support of the Tiemessen Lab, the Awadalla Lab at the Université de Montréal, and Gabriel Anabawi from the University of Botswana. We thank Christine Clifton from GSK, Judith Kumuthini and Lyndon Zass for their advice and support, and Matthew Hall for his contributions to the project. This study would not have been possible without the generosity of the participants. We acknowledge the sterling contributions of our field workers, phlebotomists, laboratory scientists, administrators, data personnel and all other staff who contributed to the data and sample collections, processing, storage, and shipping. The AWI-Gen Collaborative Centre is funded by the NIH/NHGRI (Grant U54HG006938) as part of the H3Africa Consortium. MR is a South African Research Chair in Genomics and Bioinformatics of African Populations hosted by the University of the Witwatersrand, funded by the Department of Science and Technology, and administered by National Research Foundation of South Africa (NRF). The TrypanoGEN project was funded by the Wellcome Trust, study number 099310/Z/12/Z. The Collaborative African Genetics Network (CAfGEN) is funded by the NIH/NHGRI (grant CAfGEN 1U54AI110398). The whole genome sequencing of the H3A Data was supported by a grant from the National Human Genome Research Institute, National Institutes of Health (NIH/NHGRI) U54HG003273. Cell Biology Research Lab component: This work is based on the research supported by grants awards from the Strategic Health Innovation Partnerships (SHIP) Unit of the South African Medical Research Council, a grantee of the Bill & Melinda Gates Foundation, and the South African Research Chairs Initiative of the Department of Science and Technology and National Research Foundation of South Africa (84177). JdR was partially funded by the SA National Research Foundation (SFH170626244782). SP, GB and MM and the computational infrastructure used was partially supported by grants to the H3ABionet (NIH/NHGRI U41HG006941).

594

595

596

597

598

599

600

601

602

603

604

605

606

607

608

609

610

611

612

613

614

615

616

617

618

619



## References

1. Roden DM, Mcleod HL, Relling MV, Williams MS, Mensah GA, Peterson JF, et al. Pharmacogenomics. *The Lancet*. 2019;394:521–532. doi:10.1016/S0140-6736(19)31276-0.
2. Radouani F, Zass L, Hamdi Y, Rocha JD, Sallam R, Abdelhak S, et al. A review of clinical pharmacogenetics Studies in African populations. *Per Med*. 2020;.
3. Hovelson DH, Xue Z, Zawistowski M, Ehm MG, Harris EC, Stocker SL, et al. Characterization of {ADME} gene variation in 21 populations by exome sequencing. *Pharmacogenetics and genomics*. 2017;27(3):89–100. doi:10.1097/FPC.0000000000000260.
4. Lakiotaki K, Kanterakis A, Kartsaki E, Katsila T, Patrinos GP, Potamias G. Exploring public genomics data for population pharmacogenomics. *PLoS ONE*. 2017;12(8):e0182138.
5. Mukonzo JK. The challenge of paediatric efavirenz dosing : implications and way forward for the sub-Saharan Africa. *AIDS*. 2014;28(13):1855–1857. doi:10.1097/QAD.0000000000000372.
6. Dandara C, Swart M, Mpeta B, Wonkam A, Masimirembwa C. Cytochrome P450 pharmacogenetics in African populations: implications for public health. *Expert Opin Drug Metab Toxicol*. 2014;10(6):769–785.
7. Awandu S, Raman J, Makhanthisa TI, Kruger P, Freaun J, Bousema T, et al. Understanding human genetic factors influencing primaquine safety and efficacy to guide primaquine roll-out in a pre-elimination setting in southern Africa. *Malaria Journal*. 2018;17(120).
8. Soko ND, Masimirembwa C, Dandara C. Rosuvastatin pharmacogenetics in African populations. *Pharmacogenomics*. 2018;19(18):1373–1375.
9. Choudhury A, Aron S, Botigué L, Sengupta D, Botha G, Bensellak T, et al. High depth African genomes inform human migration and health. Under embargo. 2020;.

10. The H3A Consortium. Enabling the genomic revolution in Africa. *Science*. 2014;344:1346–1348. 648  
649
11. Choudhury A, Ramsay M, Hazelhurst S, Aron S, Bardien S, Botha G, et al. 650  
Whole-genome sequencing for an enhanced understanding of genetic variation 651  
among South Africans. *Nature Communications*. 2017;8(1). 652  
doi:10.1038/s41467-017-00663-9. 653
12. Burnham KP, Overton WS. Robust Estimation of Population Size When Capture 654  
Probabilities Vary Among Animals. *Ecology*. 1979;60(5):927–936. 655
13. Sherry ST. dbSNP: the NCBI database of genetic variation. *Nucleic Acids* 656  
*Research*. 2001;29(1):308–311. doi:10.1093/nar/29.1.308. 657
14. Altshuler DL, Durbin RM, Abecasis GR, Bentley DR, Chakravarti A, Clark AG, et al. 658  
A map of human genome variation from population-scale sequencing. *Nature*. 659  
2010;467(7319):1061–1073. doi:10.1038/nature09534. 660
15. Auton A, Abecasis GR, Altshuler DM, Durbin RM, Bentley DR, Chakravarti A, et al. 661  
A global reference for human genetic variation. *Nature*. 2015;526(7571):68–74. 662  
doi:10.1038/nature15393. 663
16. Auer PL, Reiner AP, Wang G, Kang HM, Abecasis GR, Altshuler D, et al. 664  
Guidelines for Large-Scale Sequence-Based Complex Trait Association Studies: 665  
Lessons Learned from the NHLBI Exome Sequencing Project. *American Journal of* 666  
*Human Genetics*. 2016;99(4):791–801. doi:10.1016/j.ajhg.2016.08.012. 667
17. Lek M, Karczewski KJ, Minikel EV, Samocha KE, Banks E, Fennell T, et al. Analysis 668  
of protein-coding genetic variation in 60,706 humans. *Nature*. 669  
2016;536(7616):285–291. doi:10.1038/nature19057. 670
18. Karczewski KJ, Francioli LC, Tiao G, Cummings BB, Alföldi J, Wang Q, et al. 671  
Variation across 141,456 human exomes and genomes reveals the spectrum of 672  
loss-of-function intolerance across human protein-coding genes; 2019. Available 673  
from: <https://www.biorxiv.org/content/10.1101/531210v2>. 674
19. Brody JA, Morrison AC, Bis JC, O’Connell JR, Brown MR, Huffman JE, et al. 675  
Analysis commons, a team approach to discovery in a big-data environment for 676

- genetic epidemiology. *Nature Genetics*. 2017;49(11):1560–1563. 677  
doi:10.1038/ng.3968. 678
20. Sansen S, Hsu MH, Stout CD, Johnson EF. Structural insight into the altered 679  
substrate specificity of human cytochrome P450 2A6 mutants. *Arch Biochem* 680  
*Biophys*. 2007;464(2):197–206. 681
21. Zhang Z, Liu F, Chen J. Molecular structure of the ATP-bound, phosphorylated 682  
human CFTR. *Proc Natl Acad Sci USA*. 2018;115(50):12757–12762. 683
22. Ford B. CFTR structure: lassoing cystic fibrosis. *Nat Struct Mol Biol*. 684  
2017;24(1):13–14. 685
23. Kim Y, Chen J. Molecular structure of human P-glycoprotein in the ATP-bound, 686  
outward-facing conformation. *Science*. 2018;359(6378):915–919. 687
24. Whirl-Carrillo M, McDonagh EM, Hebert JM, Gong L, Sangkuhl K, Thorn CF, et al. 688  
Pharmacogenomics knowledge for personalized medicine. *Clinical Pharmacology* 689  
& *Therapeutics*. 2012;92(4):414–417. doi:10.1038/clpt.2012.96. 690
25. Masimirembwa C, Persson I, Bertilsson L, Hasler J, Ingelman-Sundberg M. A 691  
novel mutant variant of the CYP2D6 gene (CYP2D617) common in a black 692  
African population: association with diminished debrisoquine hydroxylase activity. 693  
*British Journal of Clinical Pharmacology*. 1996;42(6):713–719. 694  
doi:10.1046/j.1365-2125.1996.00489.x. 695
26. Ceballos FC, Joshi PK, Clark DW, Ramsay M. Runs of homozygosity : windows 696  
into population history and trait architecture. *Nature Publishing Group*. 697  
2018;19(4):220–234. doi:10.1038/nrg.2017.109. 698
27. Szpiech ZA, Mak ACY, White MJ, Hu D, Eng C, Burchard EG, et al. 699  
Ancestry-Dependent Enrichment of Deleterious Homozygotes in Runs of 700  
Homozygosity. *The American Journal of Human Genetics*. 2019;105(4):747–762. 701  
doi:10.1016/j.ajhg.2019.08.011. 702
28. Ceballos FC, Hazelhurst S, Ramsay M. Runs of homozygosity in sub-Saharan 703  
African populations provide insights into complex demographic histories. *Hum* 704  
*Genet*. 2019;138(10):1123–1142. 705

29. Claussnitzer M, Cho JH, Collins R, Cox NJ, Dermitzakis ET, Hurles ME, et al. A brief history of human disease genetics. *Nature*. 2020;577(7789):179–189. 706
30. Nagasaki M, Yasuda J, Katsuoka F, Nariai N, Kojima K, Kawai Y, et al. Rare variant discovery by deep whole-genome sequencing of 1,070 Japanese individuals. *Nat Commun*. 2015;6:8018. 708
31. Tennessen JA, Bigham AW, O'Connor TD, Fu W, Kenny EE, Gravel S, et al. Evolution and functional impact of rare coding variation from deep sequencing of human exomes. *Science*. 2012;337(6090):64–69. 710
32. Wright GEB, Carleton B, Hayden MR, Ross CJD. The global spectrum of protein-coding pharmacogenomic diversity. *Pharmacogenomics J*. 2018;18(1):187–195. 712
33. Wall JD, Tang LF, Zerbe B, Kvale MN, Kwok PY, Schaefer C, et al. Estimating genotype error rates from high-coverage next-generation sequence data. *Genome Res*. 2014;24(11):1734–1739. 714
34. Busby G, Band G, Si Le Q, Jallow M, Bougama E, Mangano V, et al. Admixture into and within sub-Saharan Africa. *eLife*. 2016;5:e15266. doi:10.1101/038406. 716
35. Mills R, Voora D, Peyser B, Haga SB. Delivering pharmacogenetic testing in a primary care setting. *Pharmgenomics Pers Med*. 2013;6:105–112. 718
36. Brousseau DC, McCarver DG, Drendel AL, Divakaran K, Panepinto JA. The effect of CYP2D6 polymorphisms on the response to pain treatment for pediatric sickle cell pain crisis. *J Pediatr*. 2007;150(6):623–626. 719
37. Chen L, Prasad GVR. CYP3A5 polymorphisms in renal transplant recipients: influence on tacrolimus treatment. *Pharmgenomics Pers Med*. 2018;11:23–33. 722
38. Gurdasani D, Carstensen T, Tekola-Ayele F, Pagani L, Tachmazidou I, Hatzikotoulas K, et al. The African Genome Variation Project shapes medical genetics in Africa. *Nature*. 2015;517(7534):327–332. 723
39. Zhao M, Wang Q, Wang Q, Jia P, Zhao Z. Computational tools for copy number variation (CNV) detection using next-generation sequencing data: features and perspectives. *BMC Bioinformatics*. 2013;14 Suppl 11:S1. 724

40. Mallick S, Li H, Lipson M, Mathieson I, Gymrek M, Racimo F, et al. The Simons Genome Diversity Project: 300 genomes from 142 diverse populations. *Nature*. 2016;538(7624):201–206. doi:10.1038/nature18964. 735  
736  
737
41. Chang CC, Chow CC, Tellier LC, Vattikuti S, Purcell SM, Lee JJ. 738  
Second-generation PLINK: rising to the challenge of larger and richer datasets. 739  
*GigaScience*. 2015;4(1):1–16. doi:10.1186/s13742-015-0047-8. 740
42. Alexander DH, Novembre J, Lange K. Fast model-based estimation of ancestry in 741  
unrelated individuals. *Genome Research*. 2009;19(9):1655–64. 742  
doi:10.1101/gr.094052.109. 743
43. Jakobsson M, Rosenberg NA. CLUMPP: a cluster matching and permutation 744  
program for dealing with label switching and multimodality in analysis of 745  
population structure. *Bioinformatics*. 2007;23(14):1801–1806. 746
44. Buchmann R, Hazelhurst S. *Genesis Manual*. University of the Witwatersrand; 747  
2014. Available from: <http://www.bioinf.wits.ac.za/software/genesis>. 748
45. Solovieff N, Hartley SW, Baldwin CT, Perls TT, Steinberg MH, Sebastiani P. 749  
Clustering by genetic ancestry using genome-wide SNP data. *BMC Genetics*. 750  
2010;11(1):108. doi:10.1186/1471-2156-11-108. 751
46. Venables WN, Ripley BD. *Modern Applied Statistics with S*. 4th ed. New York: 752  
Springer; 2002. 753
47. Smedley D, Haider S, Ballester B, Holland R, London D, Thorisson G, et al. 754  
*BioMart—biological queries made easy*. *BMC Genomics*. 2009;10:22. 755
48. Cingolani P, Platts A, Wang leL, Coon M, Nguyen T, Wang L, et al. A program for 756  
annotating and predicting the effects of single nucleotide polymorphisms, SnpEff: 757  
SNPs in the genome of *Drosophila melanogaster* strain w1118; iso-2; iso-3. *Fly* 758  
(Austin). 2012;6(2):80–92. 759
49. McLaren W, Gil L, Hunt SE, Riat HS, Ritchie GR, Thormann A, et al. The Ensembl 760  
Variant Effect Predictor. *Genome Biol*. 2016;17(1):122. 761

50. Liu X, Wu C, Li C, Boerwinkle E. dbNSFP v3.0: A One-Stop Database of Functional Predictions and Annotations for Human Nonsynonymous and Splice-Site SNVs. *Hum Mutat.* 2016;37(3):235–241. 762  
763  
764
51. Zhou Y, Mkrтчian S, Kumondai M, Hiratsuka M, Lauschke VM. An optimized prediction framework to assess the functional impact of pharmacogenetic variants. *Pharmacogenomics J.* 2019;19(2):115–126. 765  
766  
767
52. Li H. A statistical framework for SNP calling, mutation discovery, association mapping and population genetical parameter estimation from sequencing data. *Bioinformatics.* 2011;27(21):2987–2993. 768  
769  
770
53. Handsaker RE, Van Doren V, Berman JR, Genovese G, Kashin S, Boettger LM, et al. Large multiallelic copy number variations in humans. *Nature Genetics.* 2015;47(3):296–303. doi:10.1038/ng.3200. 771  
772  
773
54. Rentzsch P, Witten D, Cooper GM, Shendure J, Kircher M. CADD: Predicting the deleteriousness of variants throughout the human genome. *Nucleic Acids Research.* 2019;47(D1):D886–D894. doi:10.1093/nar/gky1016. 774  
775  
776
55. Bhatia G, Patterson N, Sankararaman S, Price AL. Estimating and interpreting FST: The impact of rare variants. *Genome Research.* 2013;23(9):1514–1521. doi:10.1101/gr.154831.113.23. 777  
778  
779
